# Supplementary material
Source: PubMed Central journal article supplement (PMC4183628)
Supplement: ja505407p_si_001.pdf [file ja505407p_si_001.pdf]

## Supporting information

*For*

# **On the Reactivity of Damaged Pyrimidines: DNA Cleavage via Hemiaminal Formation at the C4 Positions of the Saturated Thymine of Spore Photoproduct and Dihydrouridine**

Gengjie Lin,<sup>†</sup> Yajun Jian,<sup>†</sup> Karl J. Dria,<sup>†</sup> Eric C. Long,<sup>†</sup> and Lei Li<sup>†‡\*</sup>

<sup>†</sup>Department of Chemistry and Chemical Biology, Indiana University-Purdue University

Indianapolis (IUPUI), 402 North Blackford Street, Indianapolis, Indiana, 46202

<sup>‡</sup>Department of Biochemistry and Molecular Biology, Indiana University School of Medicine,

IUPUI, 635 Barnhill Drive, Indianapolis, Indiana 46202

[lilei@iupui.edu](mailto:lilei@iupui.edu)

## Table of Contents

|                                                                                                  | <b>Page</b> |
|--------------------------------------------------------------------------------------------------|-------------|
| <b>Abbreviations used</b>                                                                        | S3          |
| <b>General methods</b>                                                                           | S3          |
| <b>Preparation of SP TpT</b>                                                                     | S4          |
| <b>Figure S1. HPLC chromatograph of the SP hydration under various pH.</b>                       | S4          |
| <b>Figure S2. ESI-MS analyses of <sup>18</sup>O incorporation into SP TpT at pH 7.4, 37 °C.</b>  | S5          |
| <b>Figure S3. HPLC chromatograph of the SP hydration under in 0.2 KOH at 90 °C.</b>              | S5          |
| <b>Figure S4. MS analysis of <sup>18</sup>O labeled SP.</b>                                      | S6          |
| <b>Figure S5. MS analysis of double <sup>18</sup>O labeled compound 1.</b>                       | S6          |
| <b>Figure S6. Fragment structures from MS/MS analysis of 3, 4 and 5.</b>                         | S7          |
| <b>Figure S7. MS analysis of the TTSPT decomposition product 6.</b>                              | S8          |
| <b>Figure S8. MS analysis of the TTSPT decomposition product 7.</b>                              | S8          |
| <b>Figure S9. MS analysis of the TTSPT hydrate product 8.</b>                                    | S9          |
| <b>Preparation of dHdU water addition product and dHdU phosphoramidite.</b>                      | S10         |
| <b>Figure S10. HPLC chromatograph of the dHdU hydration reaction.</b>                            | S11         |
| <b>Figure S11. MS-MS analysis of the dHdU H<sub>2</sub>O-addition product.</b>                   | S12         |
| <b>Figure S12. MS-MS analysis of double O<sup>18</sup> labeled dHdU water addition product.</b>  | S13         |
| <b>Figure S13. MS-MS analysis of O<sup>18</sup> exchanged dHdU.</b>                              | S14         |
| <b>Figure S14-S18. MS analysis of TTdHdUTT, TT(9)TT, 12, 10 and 11.</b>                          | S15-16      |
| <b>Figure S19. <sup>1</sup>H NMR spectrum of dHdU water addition product in D<sub>2</sub>O.</b>  | S17         |
| <b>Figure S20. <sup>13</sup>C NMR spectrum of dHdU water addition product in D<sub>2</sub>O.</b> | S18         |
| <b>Figure S21. <sup>1</sup>H NMR spectrum of dHdU phosphoramidite in CD<sub>3</sub>OD.</b>       | S19         |
| <b>Figure S22. <sup>13</sup>C NMR spectrum of dHdU phosphoramidite in CD<sub>3</sub>OD.</b>      | S20         |
| <b>References</b>                                                                                | S21         |

## Abbreviations used

SP TpT, 5-thyminy-5,6-dihydrothymine, also called spore photoproduct; DMSO-*d*<sub>6</sub>, dimethylsulfoxide-*d*<sub>6</sub>; Abbreviations for NMR signal coupling are as follows: s, singlet; d, doublet; m, multiplet.

## General Methods

All reagent grade chemicals were purchased from Sigma, Fisher, or VWR and used without further. The <sup>1</sup>H spectra were obtained on a Bruker 500 MHz NMR Fourier transform spectrometer. NMR spectra were recorded in sample solutions in deuterated DMSO (DMSO-*d*<sub>6</sub>), with residual DMSO ( $\delta$  2.50 ppm for <sup>1</sup>H NMR) taken as the standard. The chemical shifts on NMR spectra were reported in parts per million (ppm).

HPLC analyses were performed at room temperature with a Waters (Milford, MA) breeze HPLC system coupled to a 2489 UV/Visible detector at 268 nm. An Agilent ZORBAX Bonus-RP column (5  $\mu$ m particle size, 250  $\times$  4.6 mm i.d.) was equilibrated in solvent A (10 mM ammonium acetate in 99% water and 1% acetonitrile, pH 6.5) and compounds were eluted with an ascending gradient (1% ~ 10%) of acetonitrile in 20 minutes at a flow rate of 1 mL/min. Under this gradient, SP TpT was eluted at 11.4 min, and product **1** at 7.7 min.

The LC/MS assay of alkaline treatment of 5-mer oligonucleotide and dHdU was conducted using via an Agilent 6520 Accurate Mass Q-TOF LC/MS spectrometer using an Agilent Eclipse Plus C18 column (3.5  $\mu$ m particle size, 100  $\times$  4.6 mm i.d.). The column was equilibrated in solvent A (5 mM ammonium acetate in 99% water and 2% acetonitrile, pH 6.5) and compounds were eluted with an ascending gradient (2% ~ 10%) of acetonitrile (solvent B) in 20 minutes at a flow rate of 0.5 mL/min. Under this gradient, compound **6** was eluted at 6.8 min, compound **7** at 7.9 min, compound **8** at 8.4 min, 5-mer oligonucleotide TTSP at 8.8 min, dHdU-H<sub>2</sub>O (**9**) at 5.51 min and dHdU at 10.2 min. The mass signals were monitored under both positive and negative ion modes respectively.

## Preparation of SP TpT

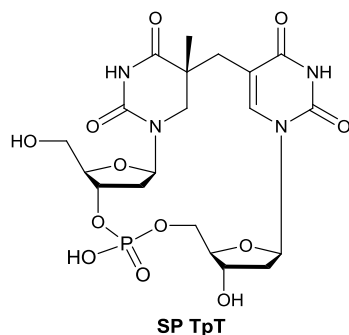

The synthesis of **SP TpT** was achieved using published procedures.<sup>[1]</sup> The structure of synthesized (**5R**)-**SP TpT** was confirmed by the NMR and the mass spectroscopy. <sup>1</sup>H NMR (DMSO-*d*<sub>6</sub>):  $\delta$  1.02 (s, 3H), 2.04-2.14 (m, 3H), 2.14-2.23 (m, 1H), 2.49 (d,  $J = 14.0$  Hz, 1H), 2.58 (d,  $J = 14.0$  Hz, 1H), 3.02 (d,  $J = 12.7$  Hz, 1H), 3.15 (d,  $J = 12.7$  Hz, 1H), 3.35 (dd,  $J = 4.2, 11.7$  Hz, 1H), 3.42 (ddd,  $J = 4.0, 4.2, 6.9$  Hz, 1H), 3.48 (dd,  $J = 4.0, 11.7$  Hz, 1H), 3.73-3.78 (m, 1H), 3.78-3.86 (m, 1H), 3.87-3.94 (m, 1H), 4.21-4.26 (m, 1H), 4.41-4.49 (m, 1H), 5.89 (dd,  $J_1 = J_2 = 7.1$  Hz, 1H), 5.95 (dd,  $J = 4.0, 8.1$  Hz, 1H), 7.51 (s, 1H), 10.0 (s, 1H), 11.2 (s, 1H); ESI-MS (positive mode) calcd for C<sub>20</sub>H<sub>28</sub>N<sub>4</sub>O<sub>12</sub>P: 547.1 (M + H<sup>+</sup>), found 547.2.

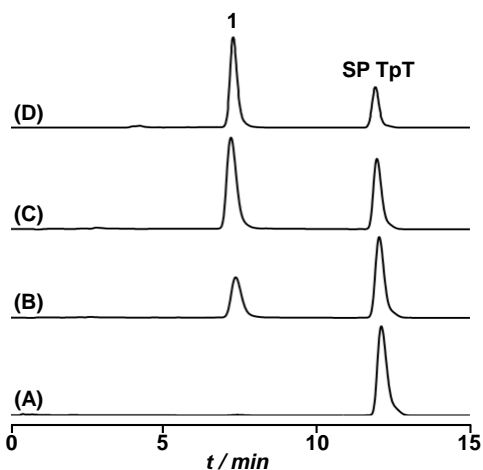

**Figure S1.** HPLC chromatograph (260 nm) of the SP hydration reaction in 50 mM K<sub>2</sub>HPO<sub>4</sub> buffer at pH 11 (A), and in 50 mM (B), 100 mM (C), as well as 200 mM KOH (D) for 2-4 days at ambient temperature. The yield of **1** was only improved by 2 ~ 4% in 400 mM or 800 mM KOH; the chromatographs for these two reactions are not shown.

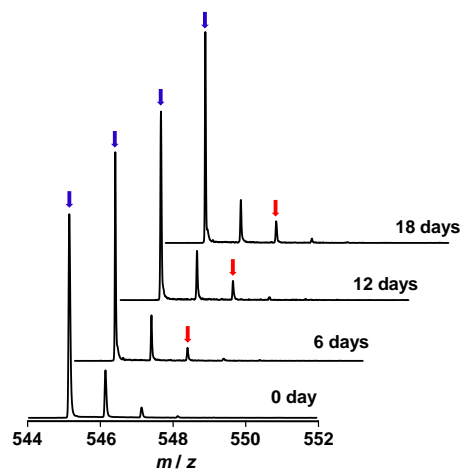

**Figure S2.** ESI-MS analyses of the  $^{18}\text{O}$  incorporation into SP TpT at pH 7.4 and  $37^\circ\text{C}$ . The peaks pointed by blue arrows exhibit a mass of 545.1, corresponding to SP without any  $^{18}\text{O}$  incorporation. The peaks pointed by red arrows exhibit a mass of 547.1, corresponding to the SP with one  $^{18}\text{O}$  incorporated which overlaps with the SP  $n + 2$  isotopic peak.

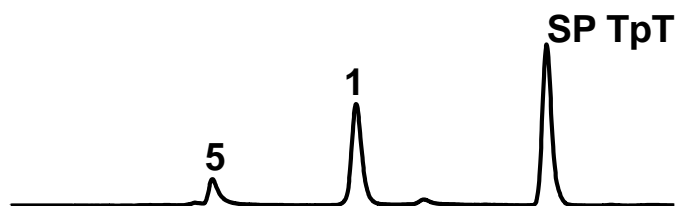

**Figure S3.** HPLC chromatograph (260 nm) of the SP hydration reaction in 200 mM KOH for 1 hour at  $90^\circ\text{C}$ . The formation of **5** from the decomposition of **1** is clearly observed.

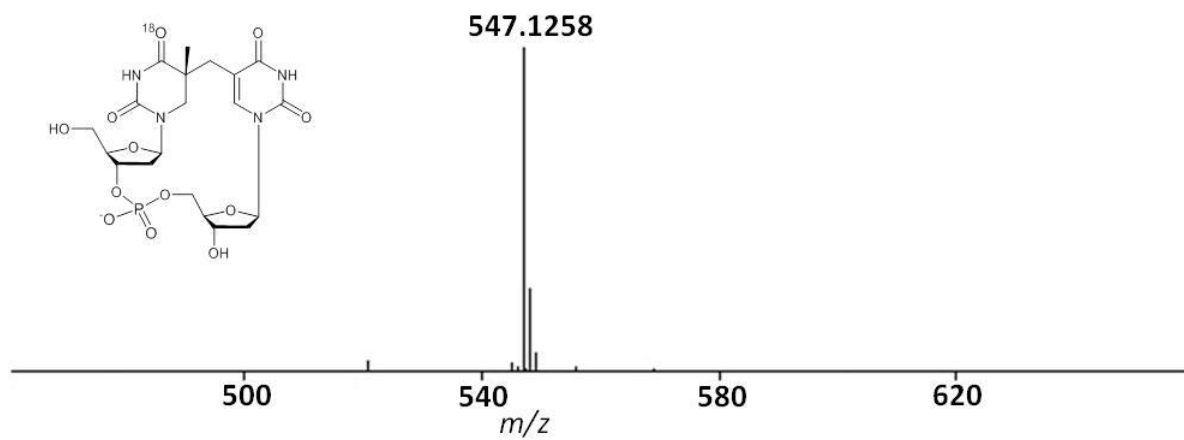

**Figure S4.** MS analysis of  $^{18}\text{O}$  labeled SP.

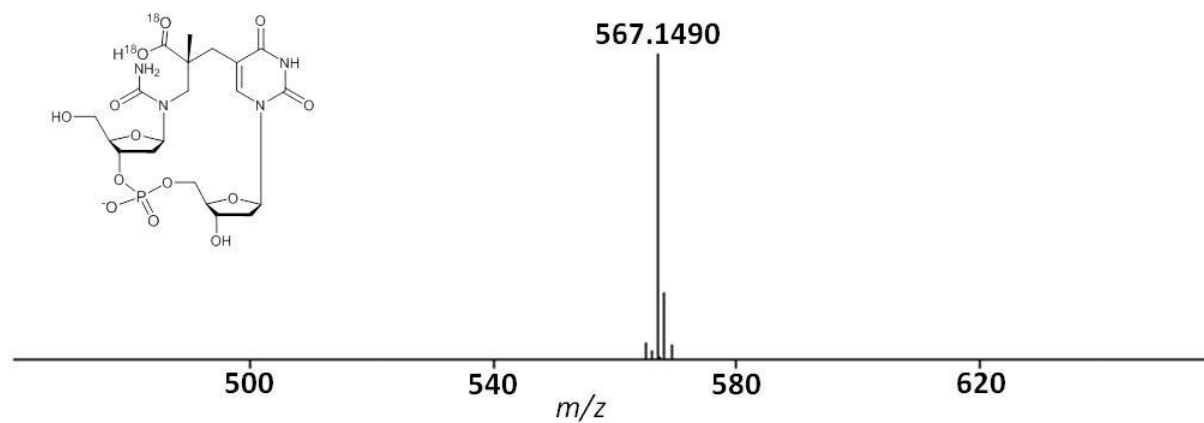

**Figure S5.** MS analysis of double- $^{18}\text{O}$  labeled compound 1.

(A)

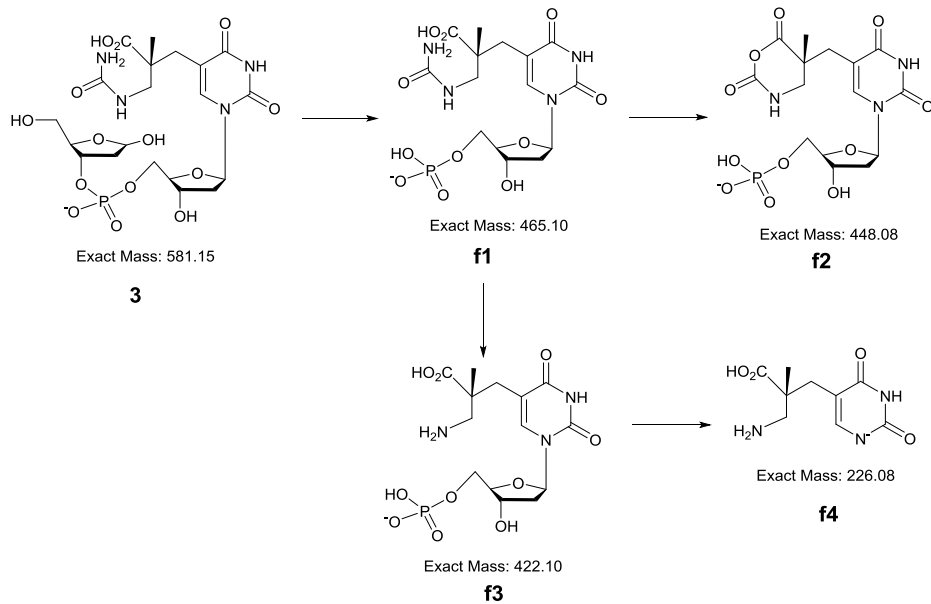

(B)

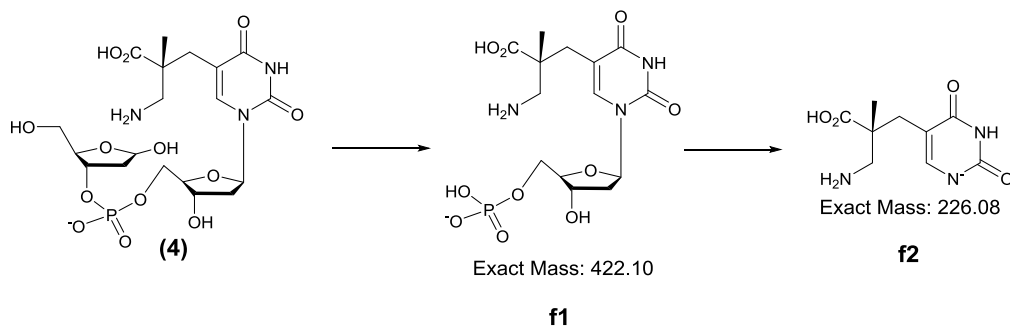

(C)

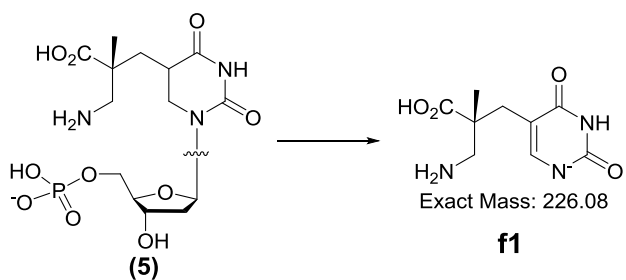

**Figure S6.** Possible structures of the fragments generated from the MS/MS analyses of the decomposition products **3** (A), **4** (B), and **5** (C) respectively.

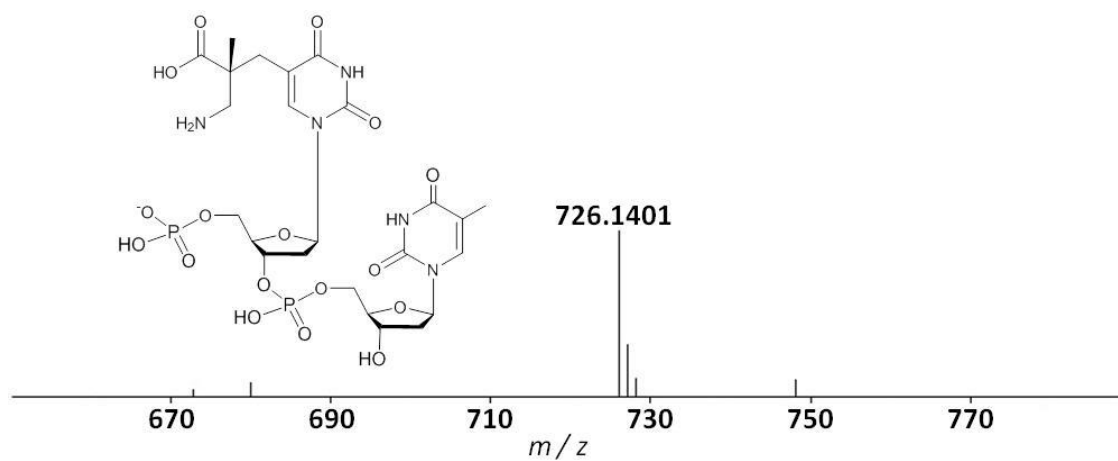

**Figure S7.** MS analysis of the TTSPT decomposition product 6.

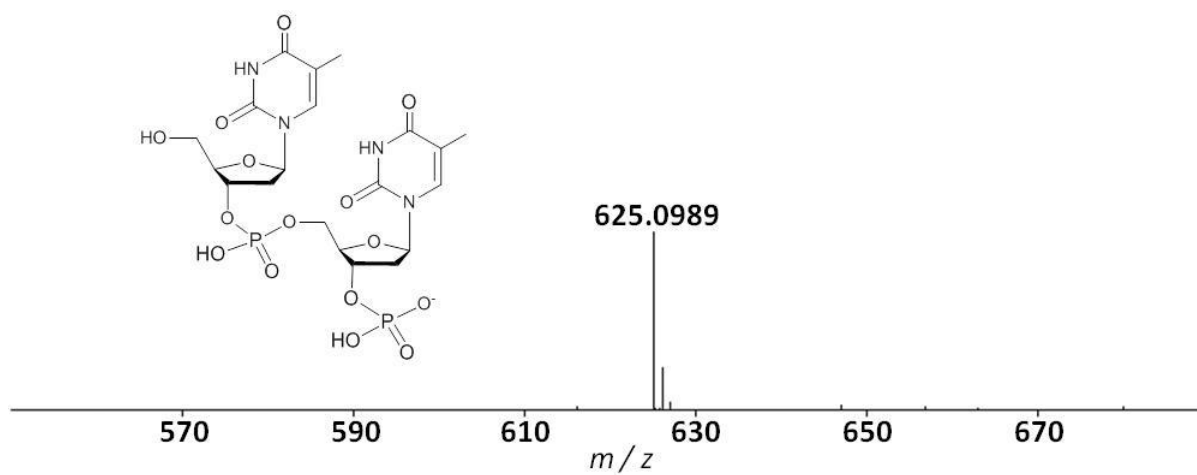

**Figure S8.** MS analysis of the TTSPT decomposition product 7.



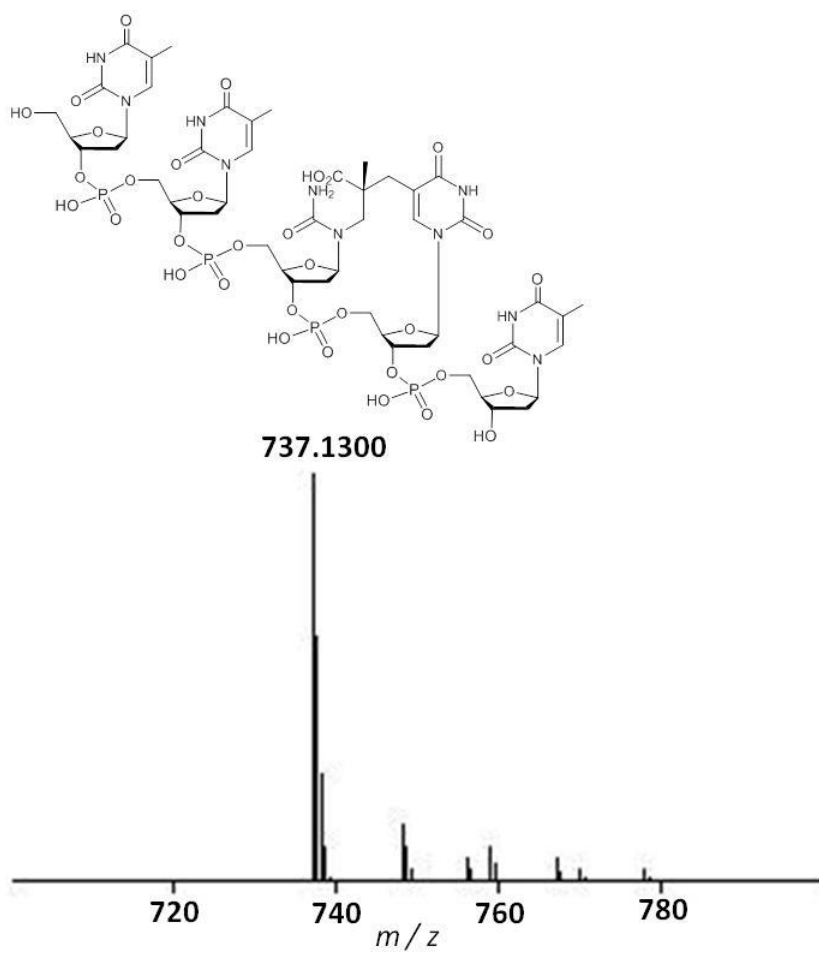

**Figure S9.** ESI-MS analysis of the TTSPT hydrate product **8**.

### dHdU water addition product

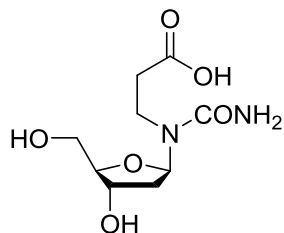

20 mg dHdU was dissolved in 0.2 M KOD/D<sub>2</sub>O solution (0.5 mL). The mixture was set at room temperature for 2 h to fully convert the dHdU to its water addition product and then directly used for NMR analysis. <sup>1</sup>H NMR (D<sub>2</sub>O): δ 2.00 (ddd, *J* = 2.6, 5.8, 13.9 Hz, 1H), 2.22 (ddd, *J* = 6.8, 9.1, 13.9 Hz, 1H), 2.40-2.53 (m, 2H), 3.40-3.52 (m, 2H), 3.65 (dd, *J* = 5.5, 12.1 Hz, 1H), 3.71 (dd, *J* = 4.3, 12.1 Hz, 1H), 3.79-3.84 (m, 1H), 4.28-4.34 (m, 1H), 5.99 (dd, *J* = 5.8, 9.1 Hz, 1H); <sup>13</sup>C NMR (CDCl<sub>3</sub>): δ 36.3, 37.7, 39.7, 61.9, 71.1, 84.8, 86.0, 160.7, 180.3; HRMS (M<sup>-</sup>) calcd for C<sub>9</sub>H<sub>15</sub>N<sub>2</sub>O<sub>6</sub><sup>-</sup>: 247.0936 (M<sup>-</sup>), found.

### dHdU phosphoramidite

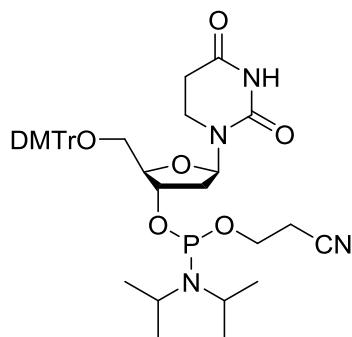

The product was isolated as a mixture of isomers. <sup>1</sup>H NMR (MeOD): δ 1.06 (s, 3H), 1.07 (s, 3H), 1.15 (s, 6H), 1.16 (s, 6H), 1.17 (s, 3H), 1.18 (s, 3H), 2.10-2.18 (m, 1H), 2.19-2.32 (m, 3H), 2.37-2.52 (m, 6H), 2.64-2.68 (m, 2H), 3.23-3.30 (m, 2H), 3.32-3.40 (m, 4H), 3.46-3.74 (m, 9H), 3.73 (s, 12H), 3.75-3.85 (m, 1H), 3.93-3.98 (m, 1H), 3.99-4.03 (m, 1H), 4.54-4.64 (m, 2H), 6.24-6.30 (m, 2H), 6.79-6.83 (m, 8H), 7.15-7.20 (m, 2H), 7.22-7.34 (m, 12H), 7.39-7.45 (m, 4H); <sup>13</sup>C NMR (CDCl<sub>3</sub>): δ 20.8, 20.9, 25.0, 25.1, 31.8, 37.0, 37.3, 44.3, 44.4, 55.7, 59.6, 64.3, 74.3, 74.6, 85.0, 85.1, 85.3, 87.6, 114.2, 119.4, 119.6, 128.0, 128.8, 129.4, 131.3, 136.9, 137.0, 146.2, 154.6, 160.1, 172.5; HRMS (M<sup>+</sup>) calcd for C<sub>39</sub>H<sub>50</sub>N<sub>4</sub>O<sub>8</sub>P<sup>+</sup>: 733.3361 (M<sup>+</sup>), found 733.3350.

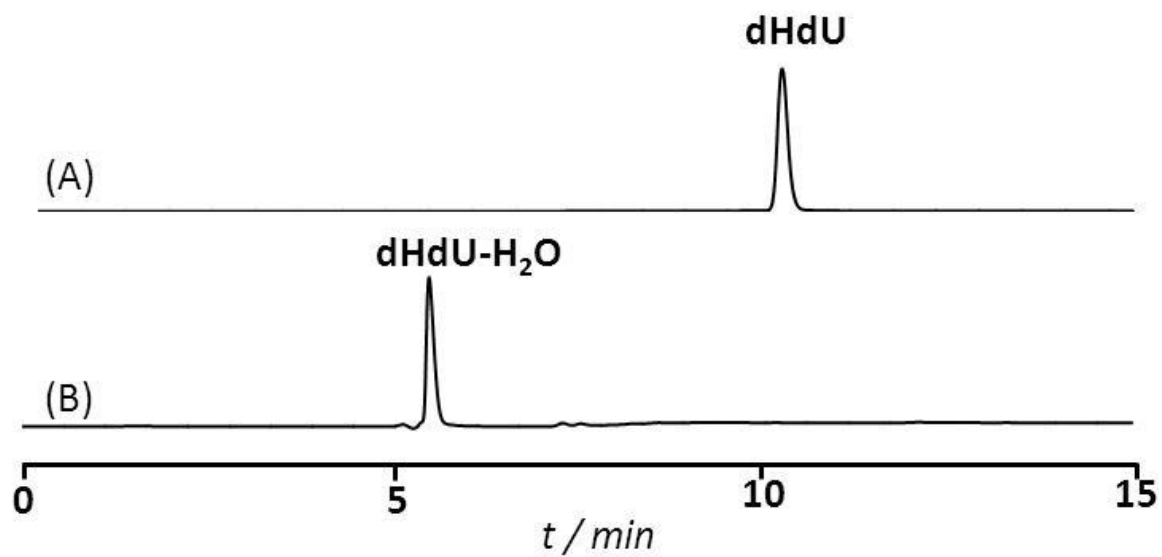

**Figure S10.** HPLC chromatograph (230 nm) of the dHdU hydration reaction in 0.2 M KOH at room temperature for 0 min (A), and for 30 min (B).

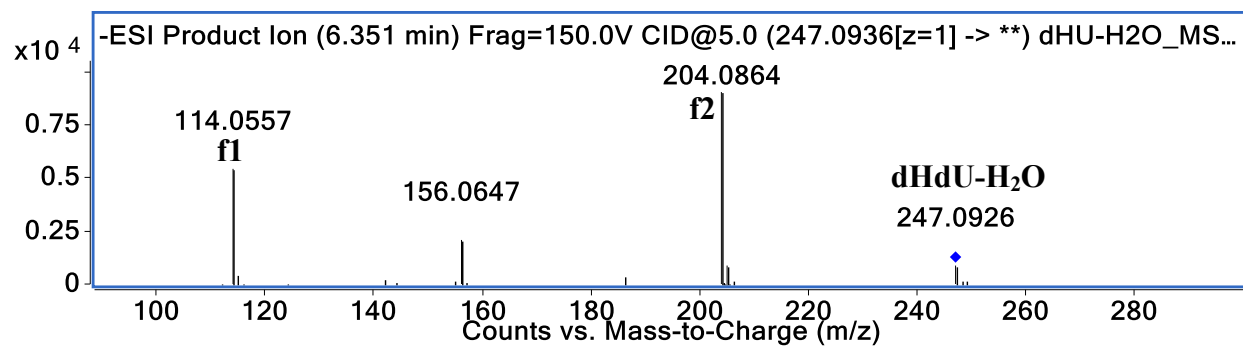

**Structure of dHdU H<sub>2</sub>O-addition product**

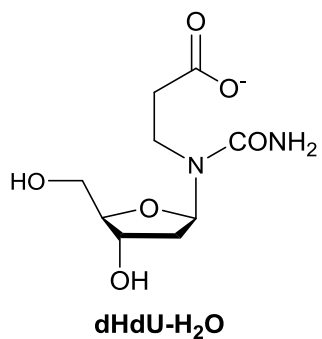

Chemical Formula: C<sub>9</sub>H<sub>15</sub>N<sub>2</sub>O<sub>6</sub><sup>-</sup>

Exact Mass: 247.0936

**Fragment structure (negative mode)**

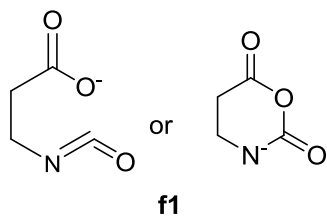

Chemical Formula: C<sub>4</sub>H<sub>4</sub>NO<sub>3</sub><sup>-</sup>

Exact Mass: 114.0197

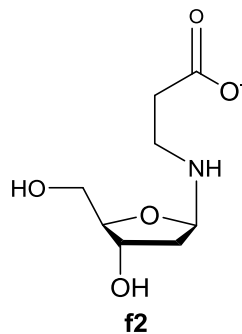

Chemical Formula: C<sub>8</sub>H<sub>14</sub>NO<sub>5</sub><sup>-</sup>

Exact Mass: 204.0877

**Figure S11.** MS-MS analysis of the dHdU H<sub>2</sub>O adduct **9**.

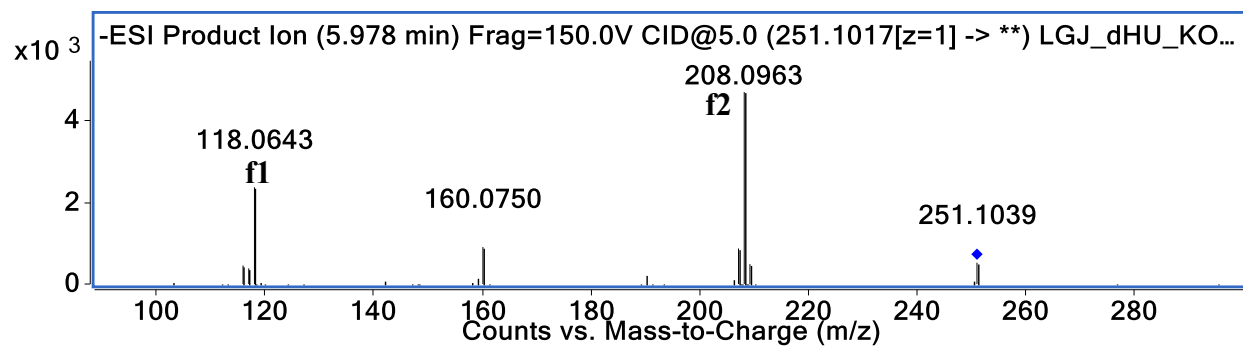

**Structure of doubly-  $O^{18}$  labeled dHdU water adduct (9)**

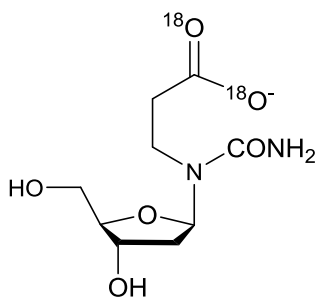

Chemical Formula:  $C_9H_{15}N_2O_4^{18}O_2^-$   
Exact Mass: 251.10

**Fragment structure (negative mode)**

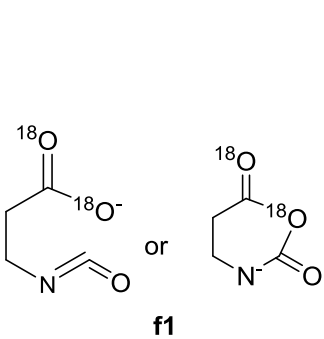

**f1**  
Chemical Formula:  $C_4H_4NO^{18}O_2^-$   
Exact Mass: 118.03

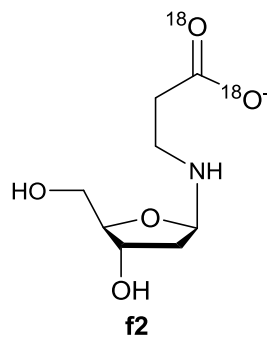

**f2**  
Chemical Formula:  $C_8H_{14}NO_3^{18}O_2^-$   
Exact Mass: 208.10

**Figure S12.** MS-MS analysis of doubly- $O^{18}$ -labeled dHdU water adduct **9**.

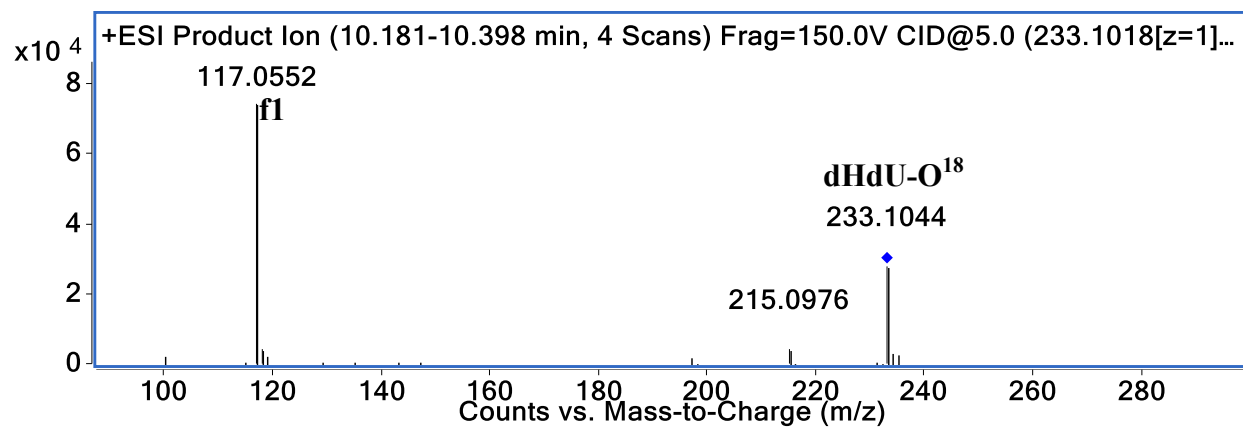

**Structure of O<sup>18</sup> exchanged dHdU addition product**

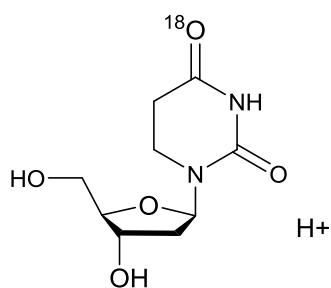

**dHdU-O<sup>18</sup>**

Chemical Formula: C<sub>9</sub>H<sub>15</sub>N<sub>2</sub>O<sub>4</sub><sup>18</sup>O<sup>+</sup>

Exact Mass: 233.1018

**Fragment structure (positive mode)**

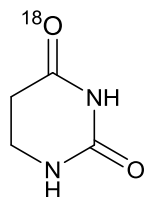

**f1**

Chemical Formula: C<sub>4</sub>H<sub>7</sub>N<sub>2</sub>O<sup>18</sup>O<sup>+</sup>

Exact Mass: 117.0544

**Figure S13.** MS-MS analysis of O<sup>18</sup> exchanged dHdU.

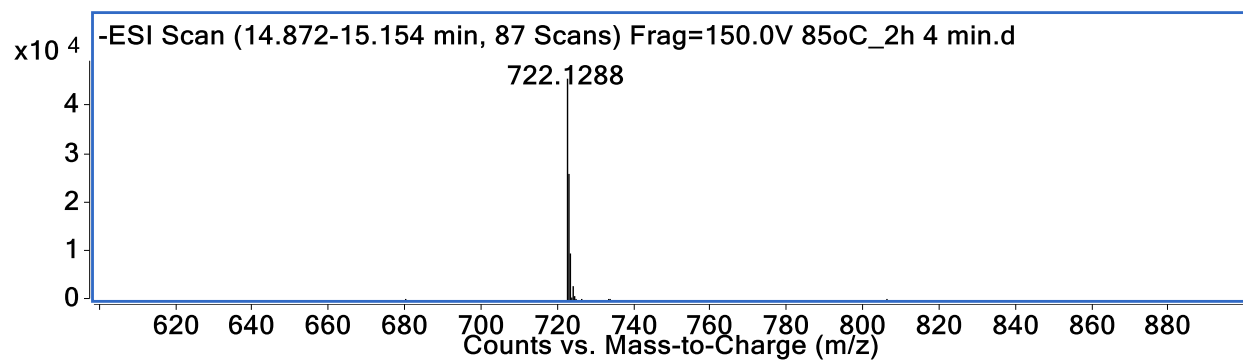

**Figure S14.** MS analysis of the **TTdHdUTT**.

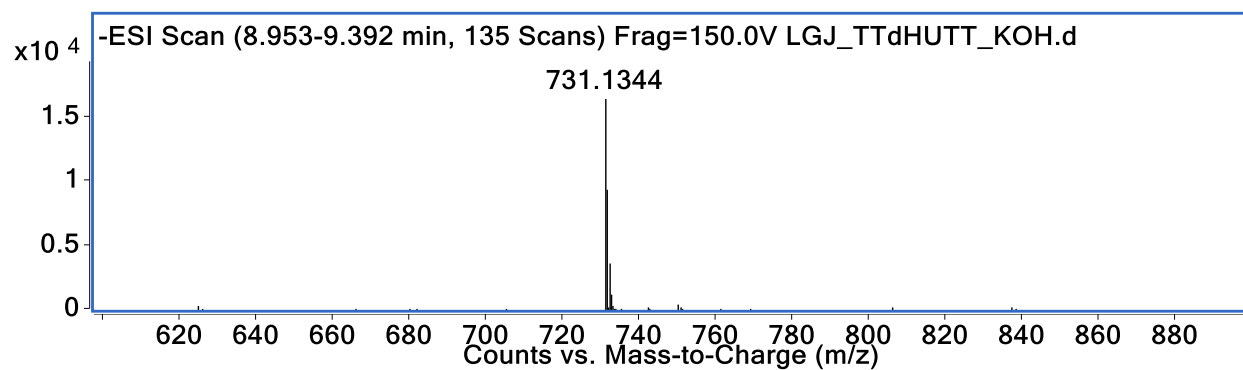

**Figure S15.** MS analysis of the **TT(9)TT**.

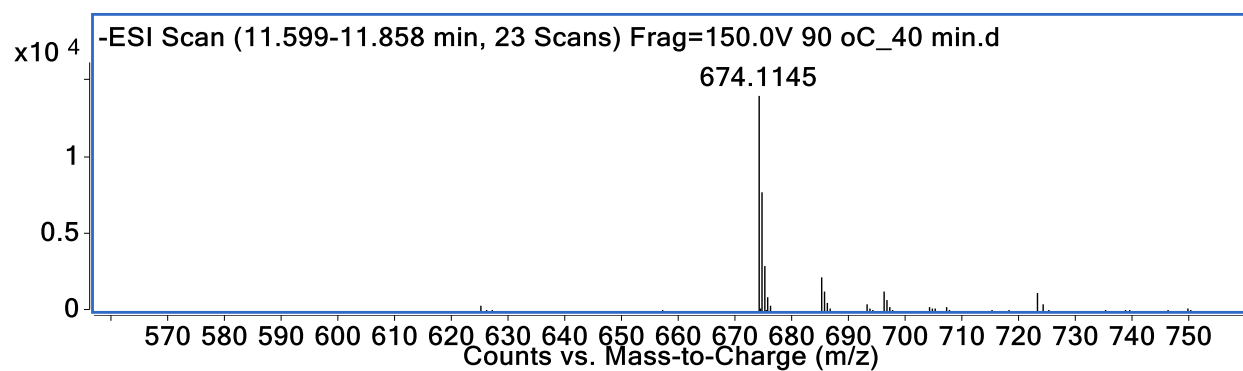

**Figure S16.** MS analysis of the **TT(9)TT** decomposition product **10**.

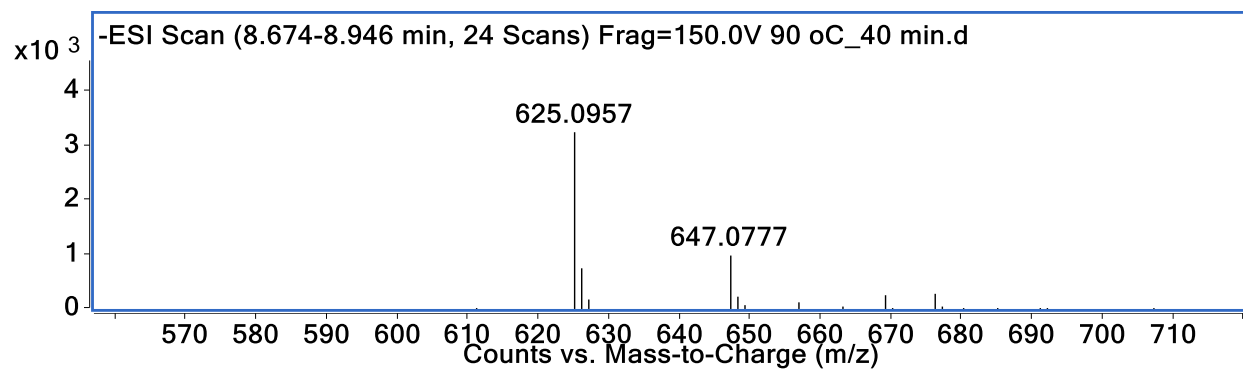

Figure S17. MS analysis of the TT(9)TT decomposition product 11.

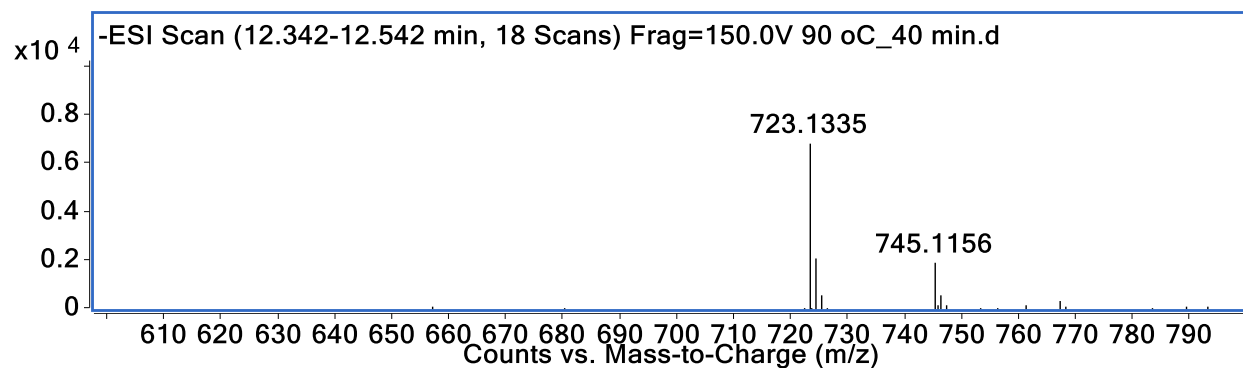

Figure S18. MS analysis of the TT(9)TT decomposition product 12.



LGJ-dHU-KOD  
D2O

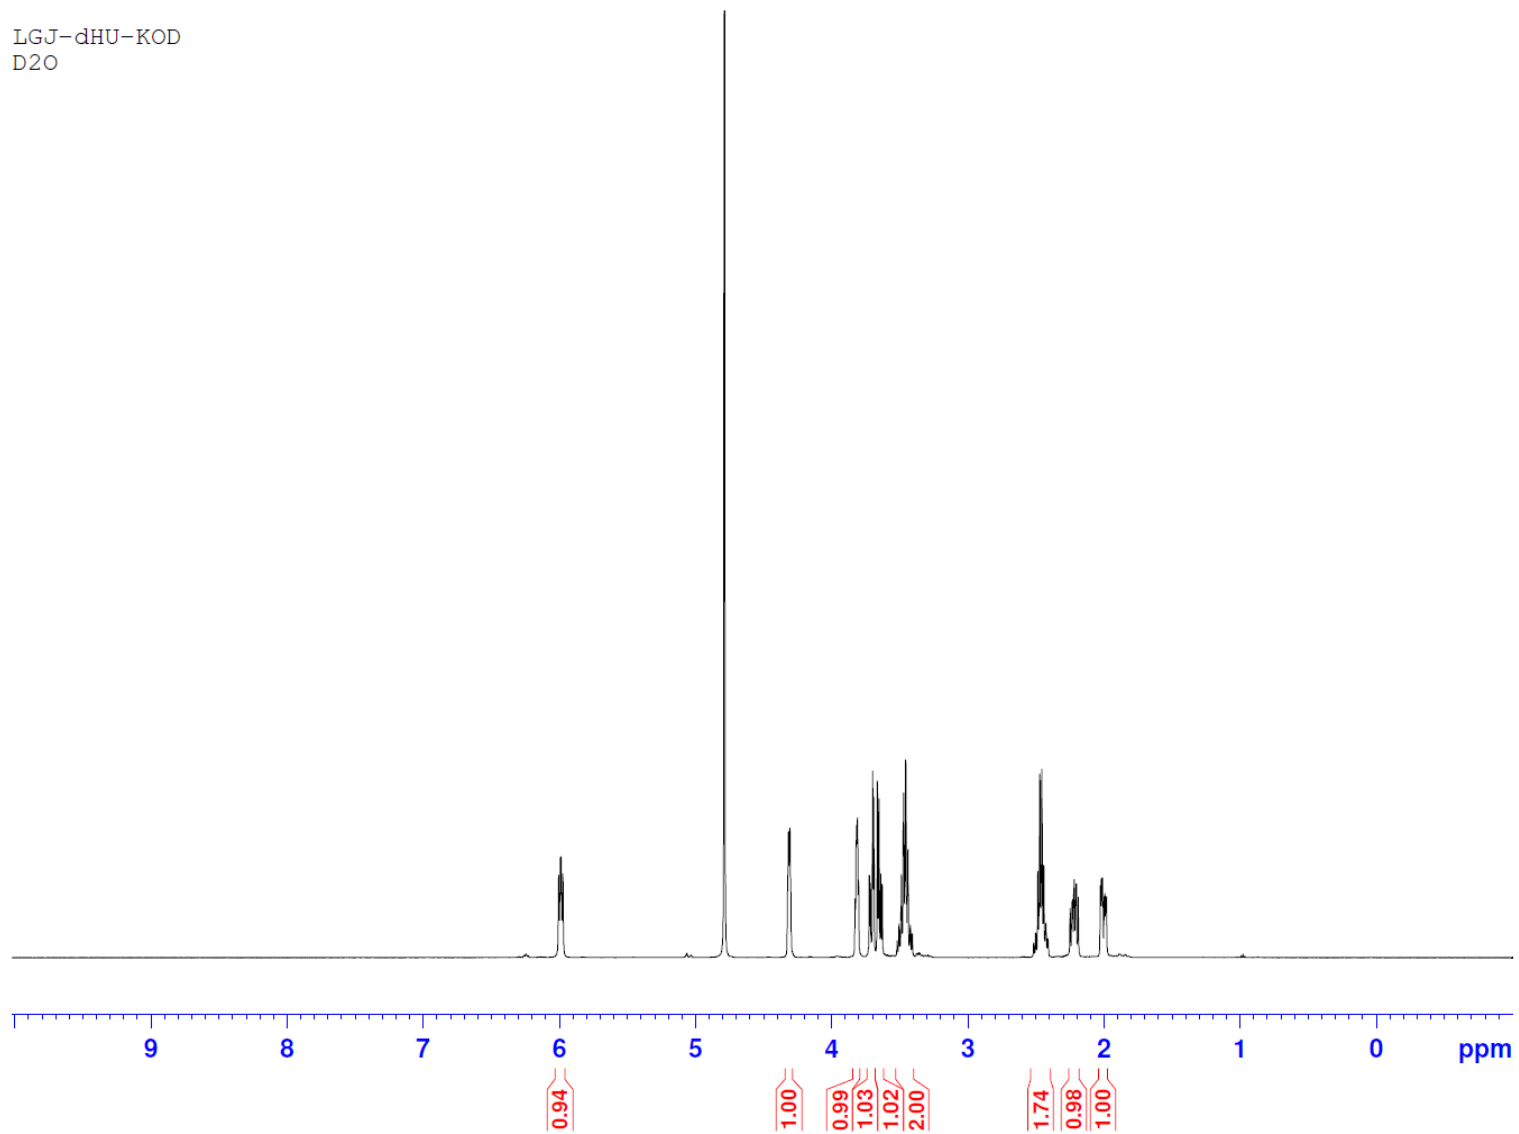

**Figure S19.**  $^1\text{H}$  NMR spectrum of dHdU water adduct **9** in  $\text{D}_2\text{O}$ .

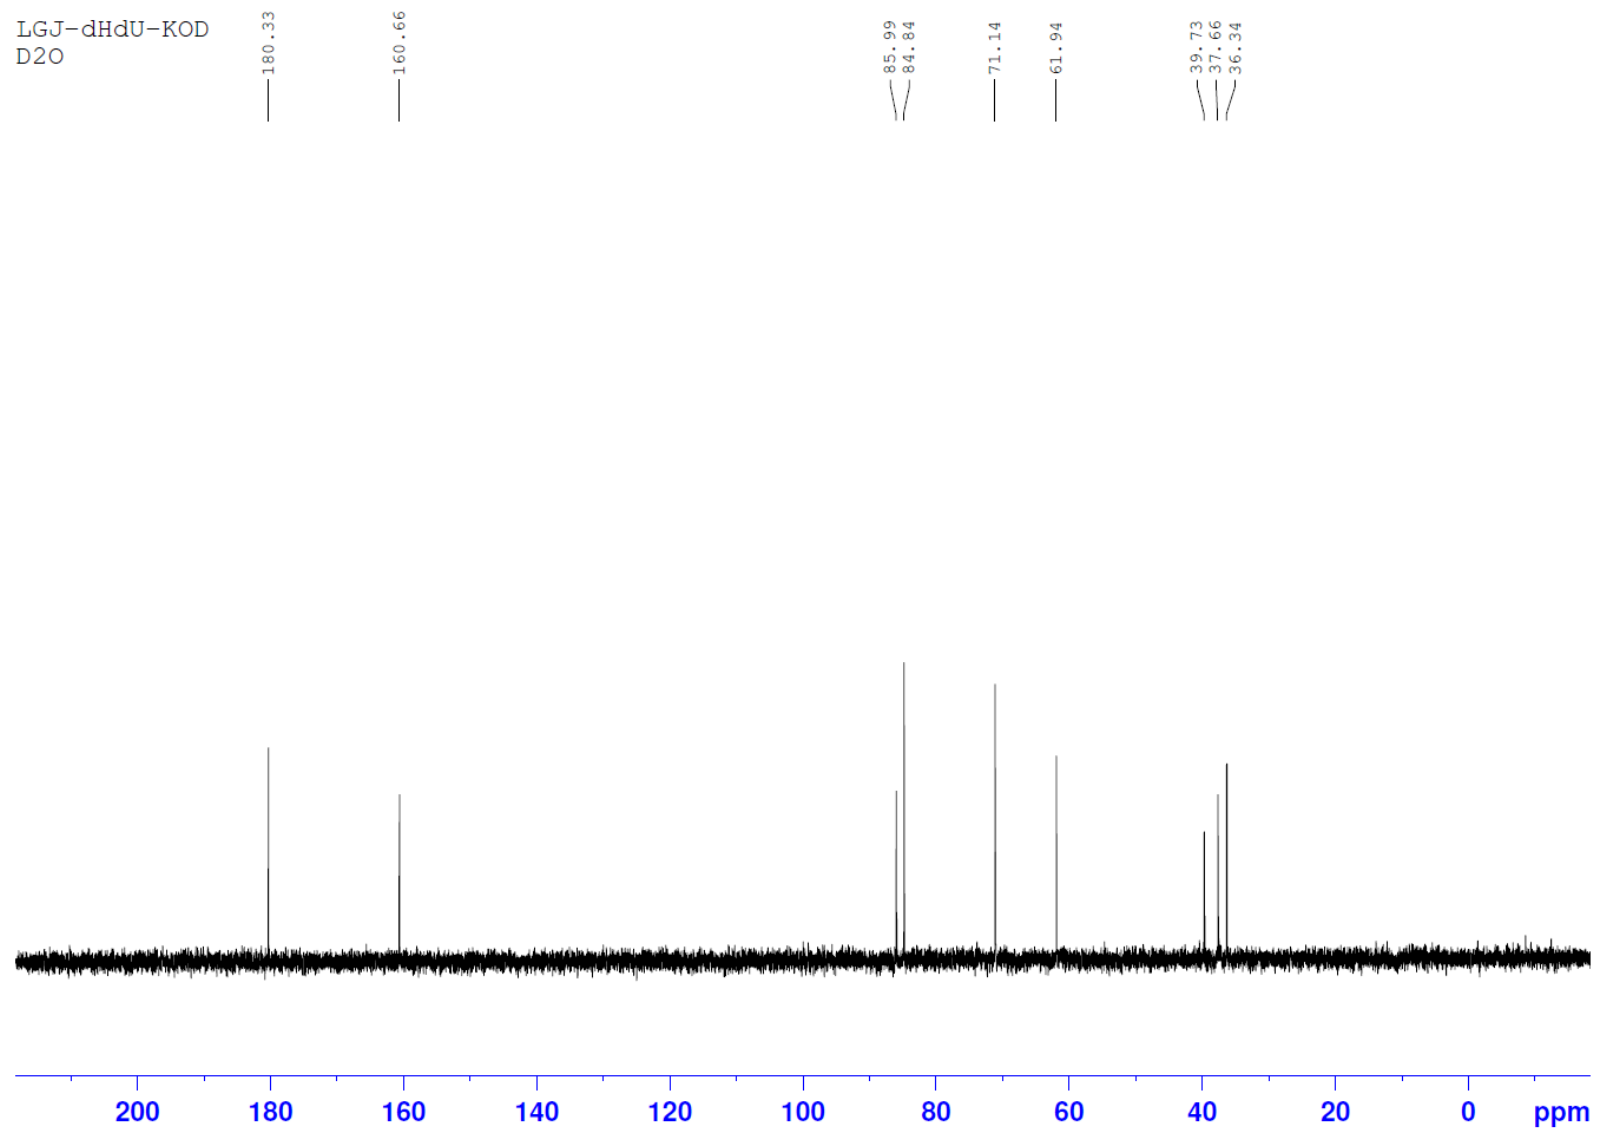

**Figure S20.**  $^{13}\text{C}$  NMR spectrum of dHdU water adduct **9** in  $\text{D}_2\text{O}$ .

dHdU phosphoramidite  
MeOD

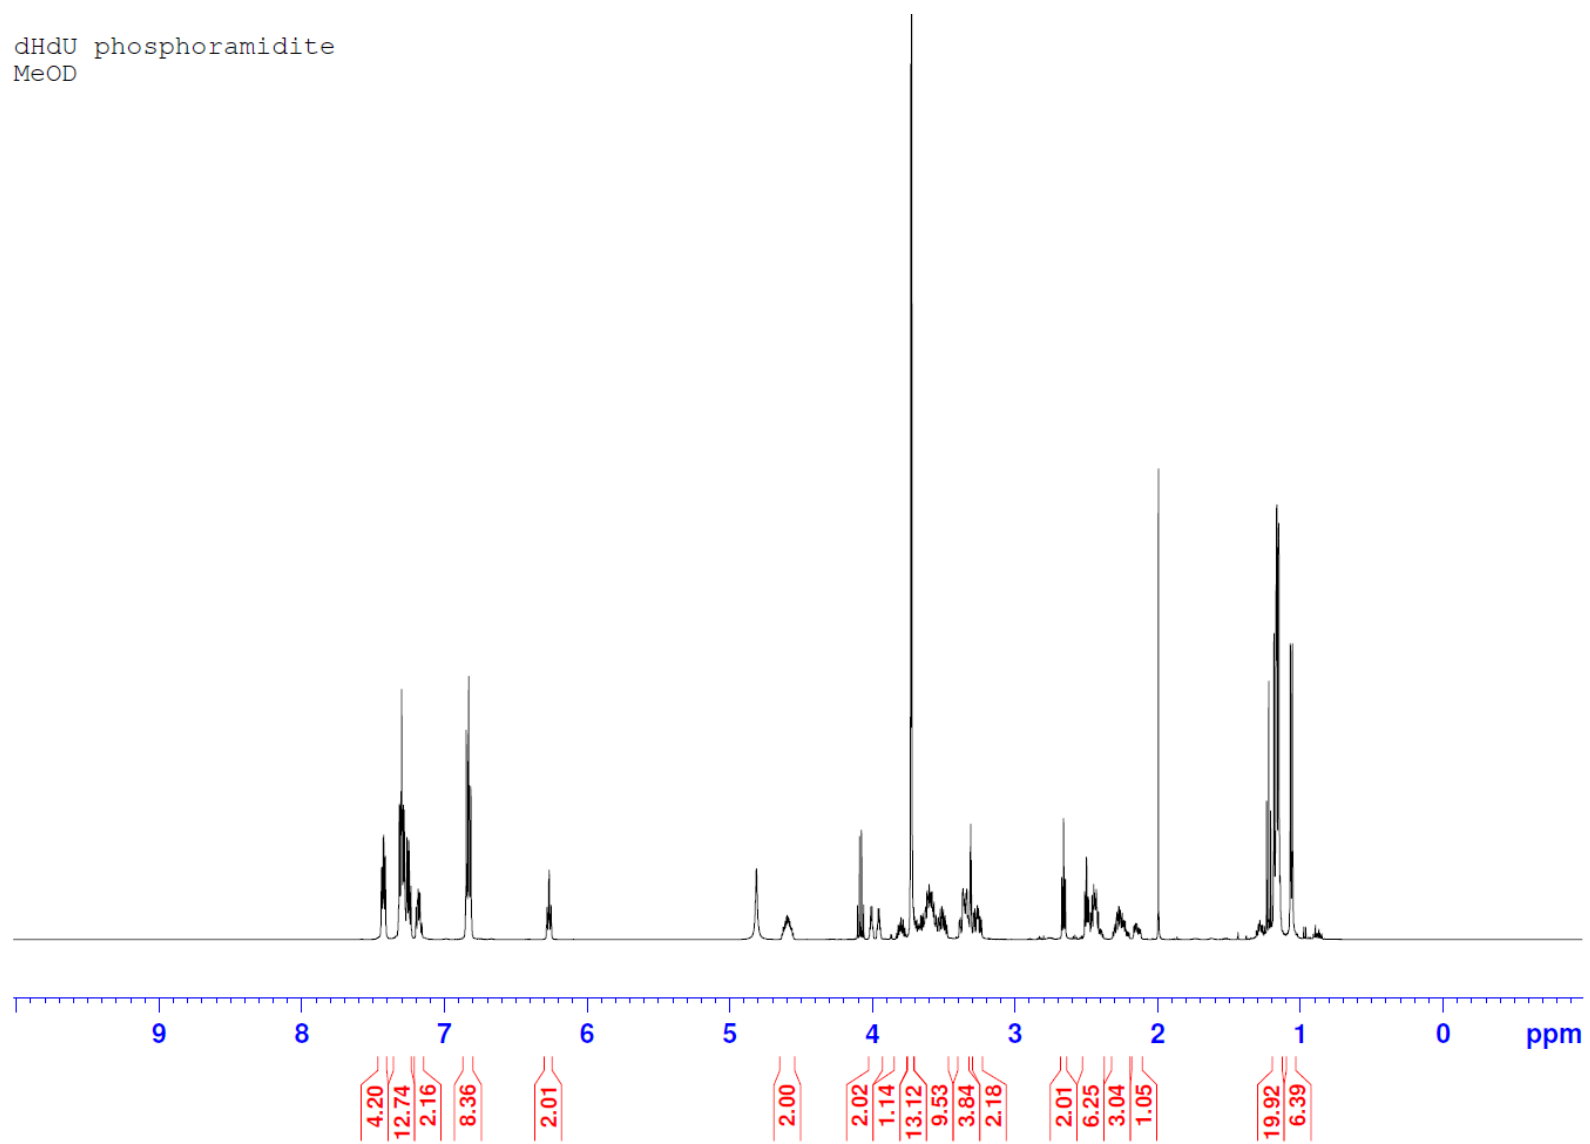

**Figure S21.** <sup>1</sup>H NMR spectrum of dHdU phosphoramidite in CD<sub>3</sub>OD.

LGJ-dHdU-P (III) -C13  
MeOD

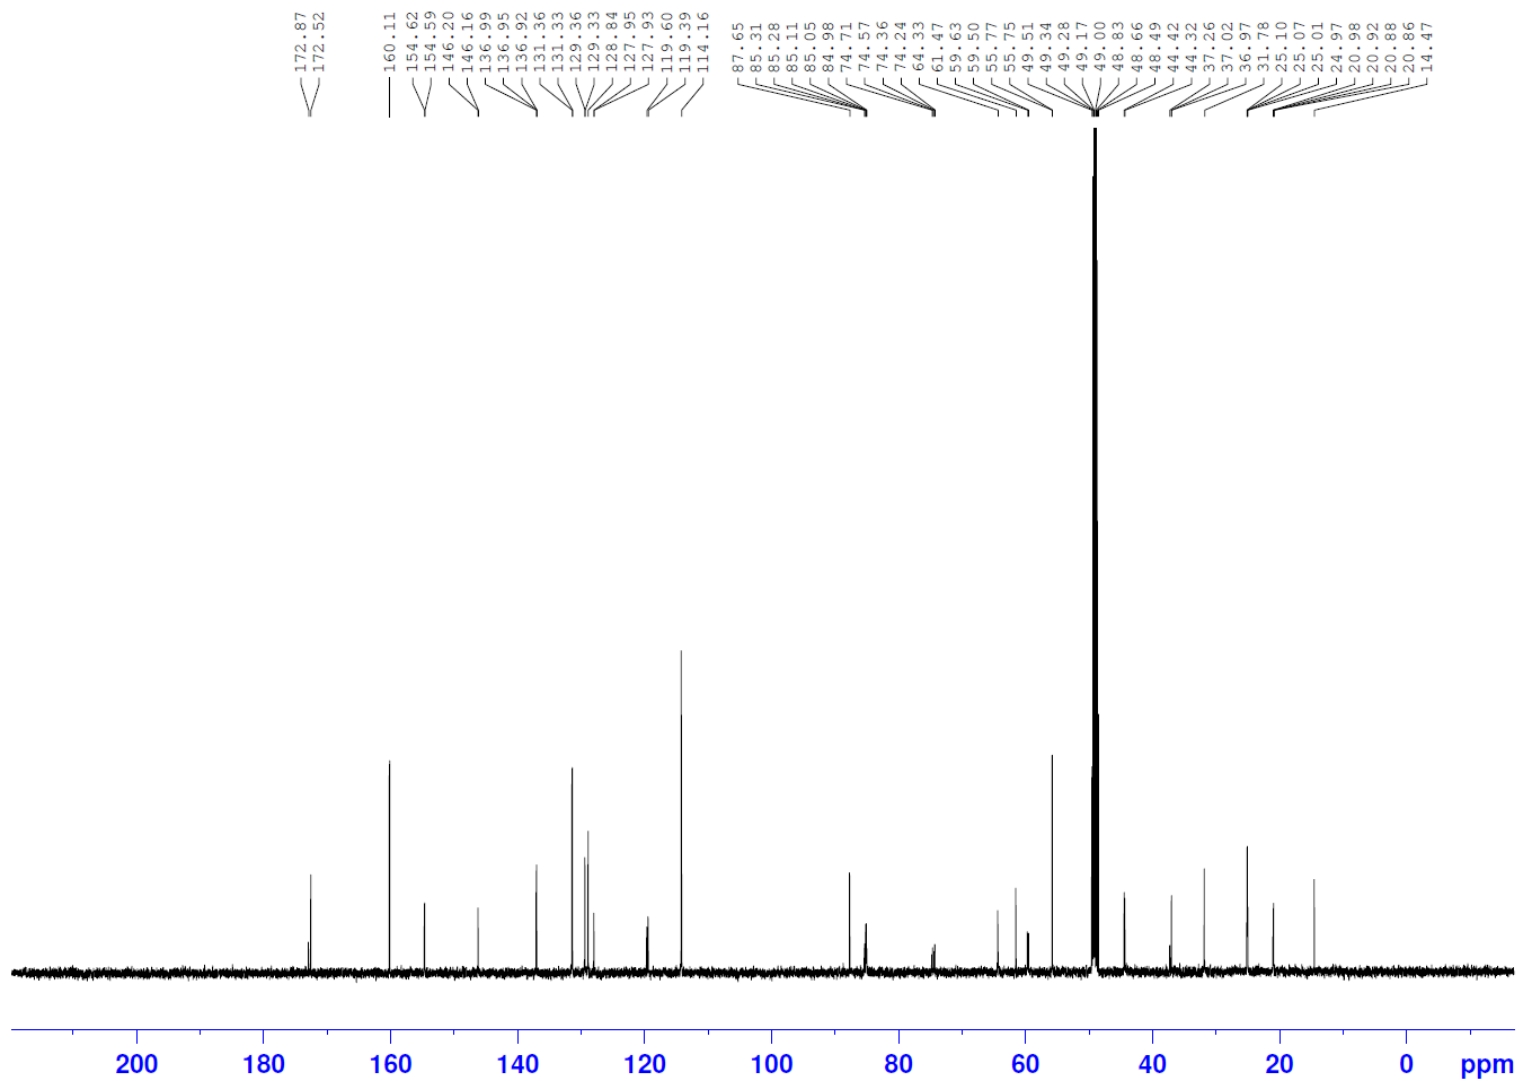

Figure S22.  $^{13}\text{C}$  NMR spectrum of dHdU phosphoramidite in  $\text{CD}_3\text{OD}$ .

## References

- (1) (a) T. Chandra, S. C. Silver, E. Zilinskas, E. M. Shepard, W. E. Broderick, J. B. Broderick, *J. Am. Chem. Soc.* **2009**, *131*, 2420-2421. (b) G. J. Lin, L. Li, *Angew. Chem. Int. Ed. Engl.* **2010**, *49*, 9926.
